# Supplementary material for: Identification of Paired-related Homeobox Protein 1 as a key mesenchymal transcription factor in pulmonary fibrosis
Source: eLife journal article supplement (doi:10.7554/elife.79840), 2023-06-01

Blots for Figure 1C

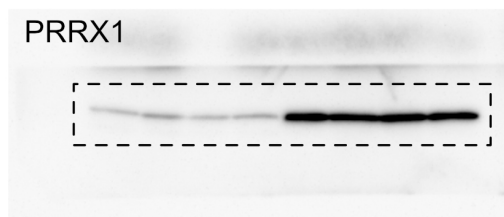

ACTB

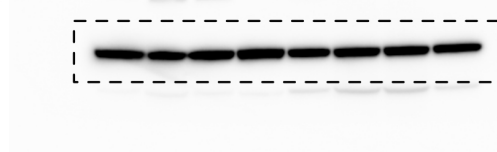

Blots for Figure 2D

PRRX1

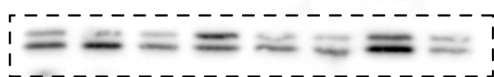

GAPDH

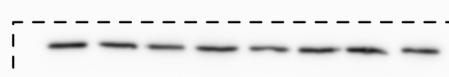

Blots for Figure 4B

PRRX1

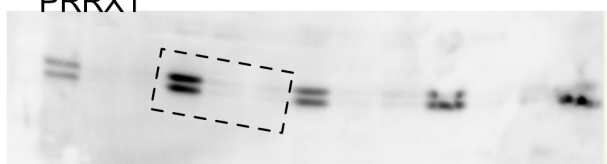

GAPDH

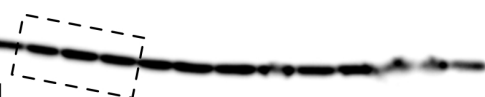

PRRX1

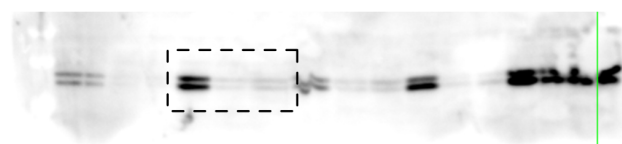

GAPDH

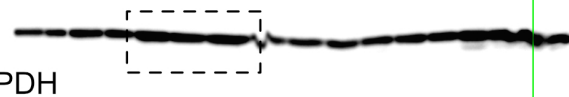

Blots for Figure 5B

ACTA2

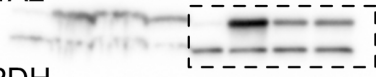

GAPDH

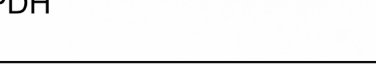

ACTA2

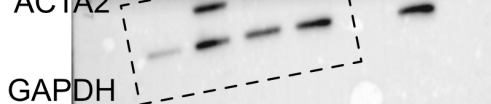

GAPDH

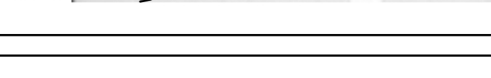

Blots for Figure 5E

p-SMAD2/3

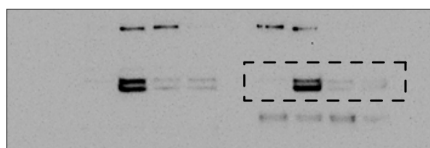

SMAD2/3

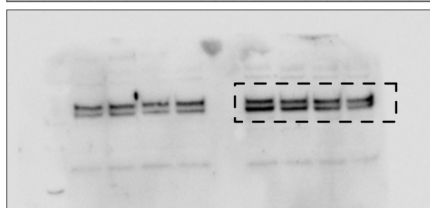

GAPDH

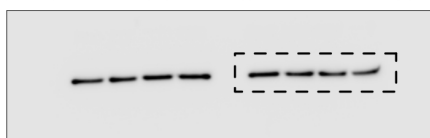

p-SMAD2/3

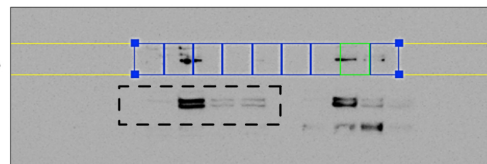

SMAD2/3

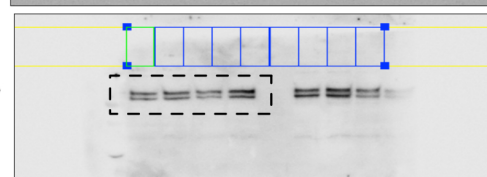

GAPDH

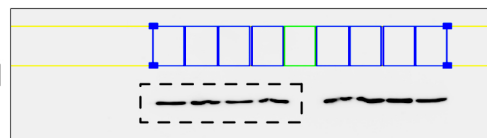

### Blots for Figure 6B

PRRX1

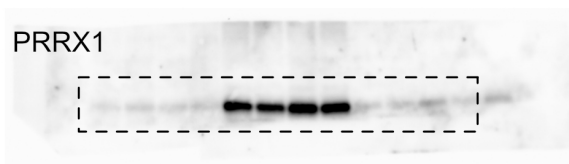

TUB

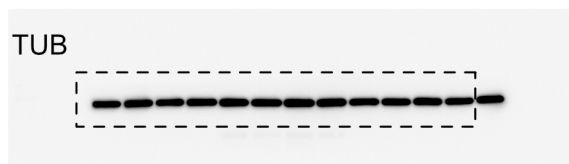

### Blots for Figure 7B

FN1

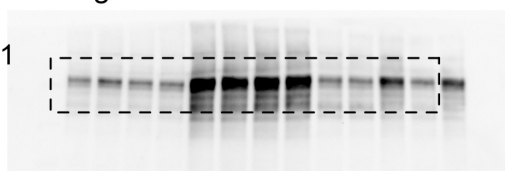

COL1

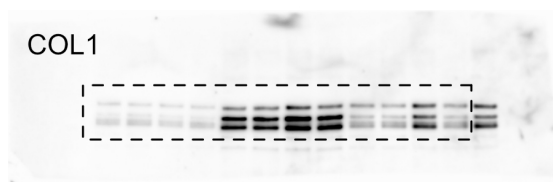

ACTA2

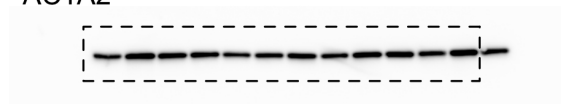

(With respect to TUB, see unedited blots for Figure 6B above - from same blot series)

### Blots for Figure 8B

FN1

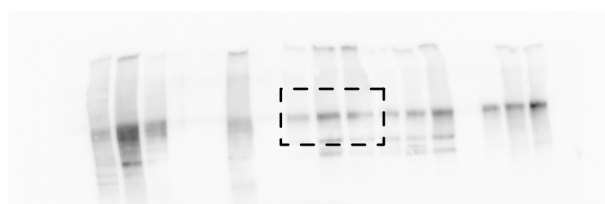

COL1

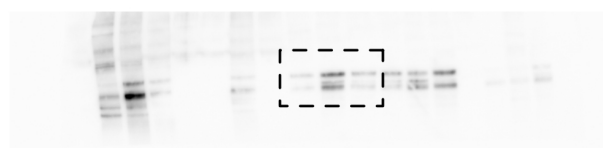

ACTA2

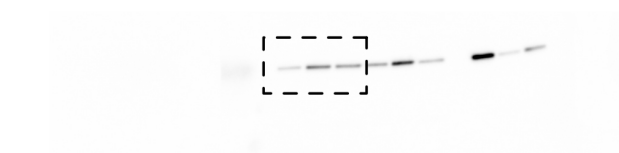

TUB

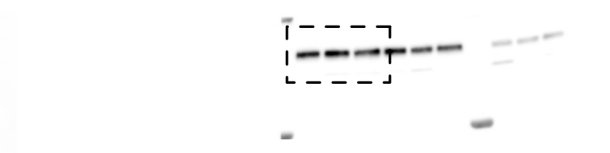

Supplement: fig1-data1 [file elife-79840-fig1-data1-v2.zip]
