# Supplementary material for: Identification of Paired-related Homeobox Protein 1 as a key mesenchymal transcription factor in pulmonary fibrosis
Source: eLife journal article supplement (doi:10.7554/elife.79840), 2023-06-01

Blots for Figure 3-figure supplement 1A

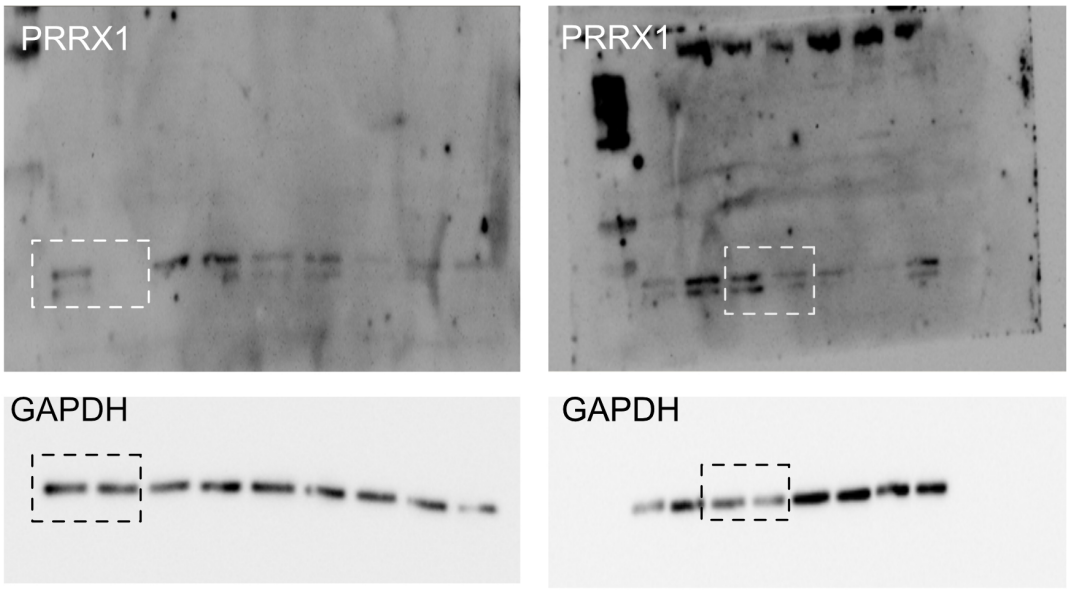

Blots for Figure 3-figure supplement 1D

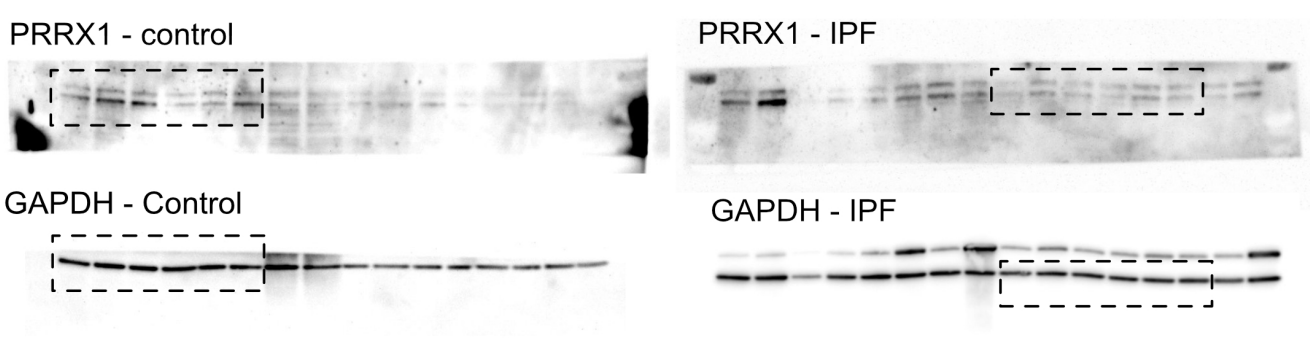

Blots for Figure 3-figure supplement 1E

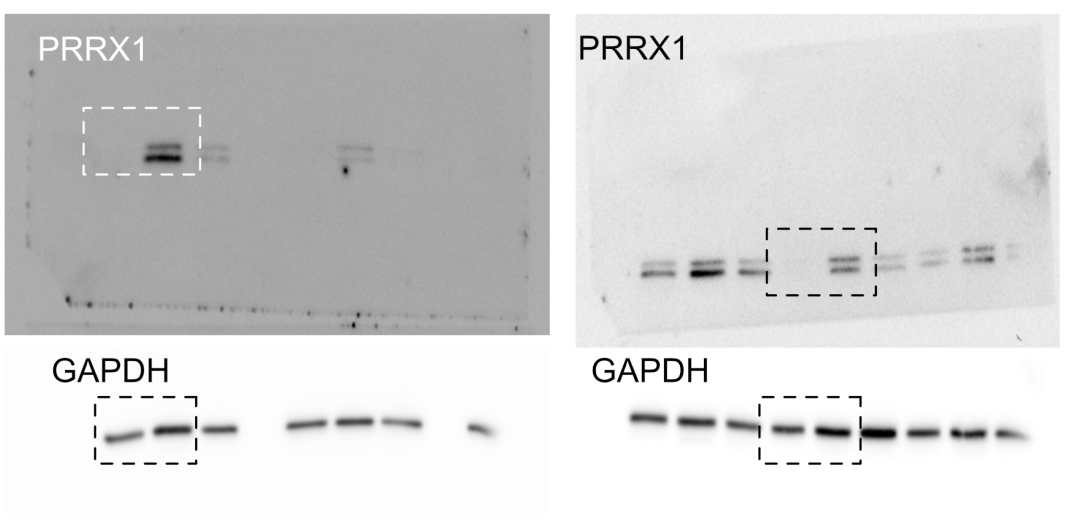

Blots for Figure 5-figure supplement 1B

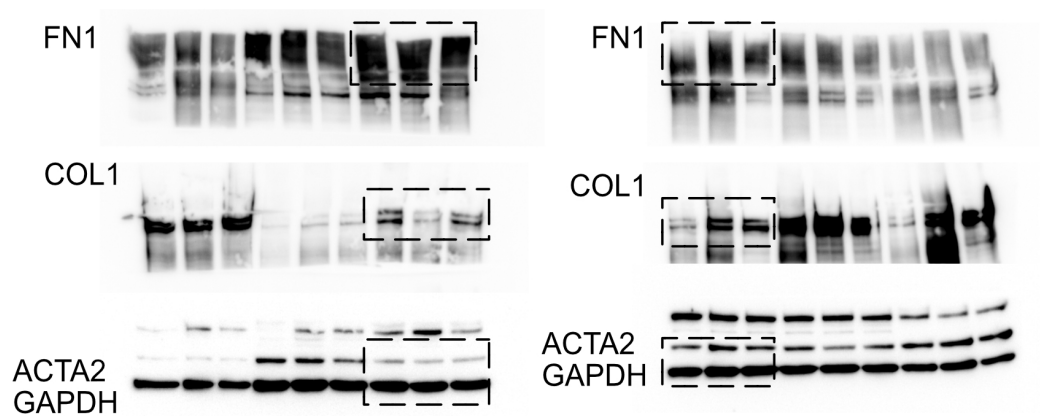

Blots for Figure 5-figure supplement 2C

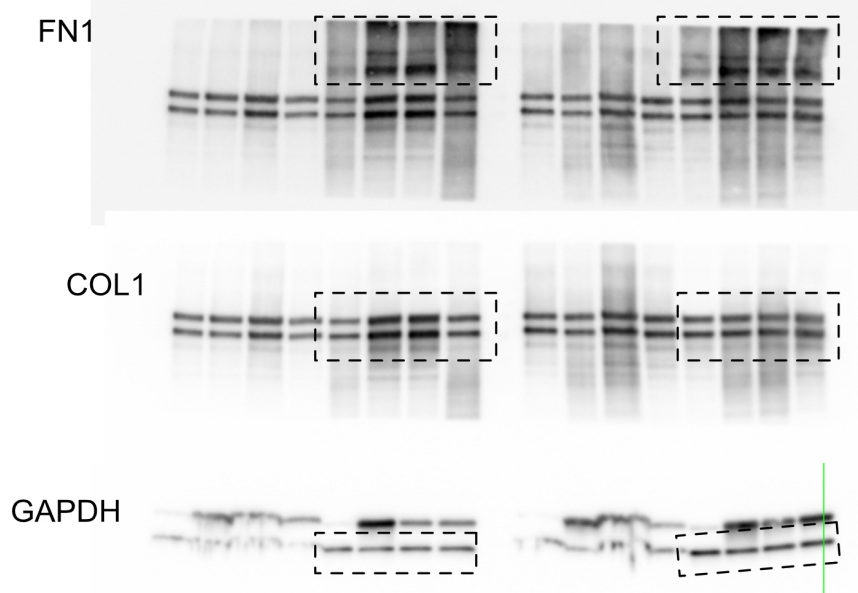

Blots for Figure 5-figure supplement 4A

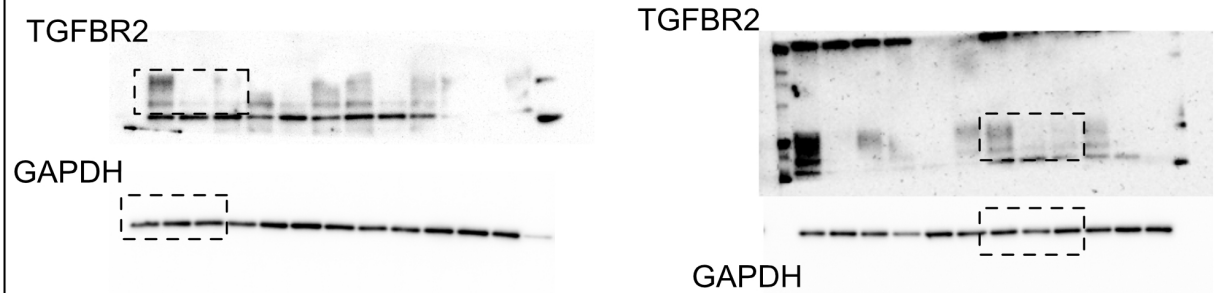

Blots for Figure 5-figure supplement 4B

PPM1A

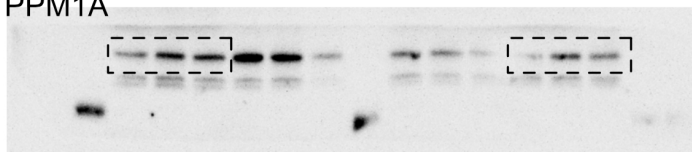

TUB

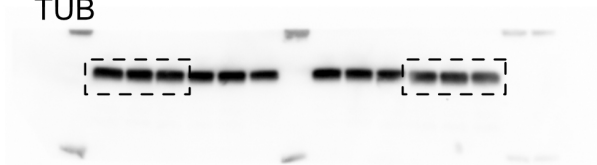

Blots for Figure 5-figure supplement 4C

PPM1A

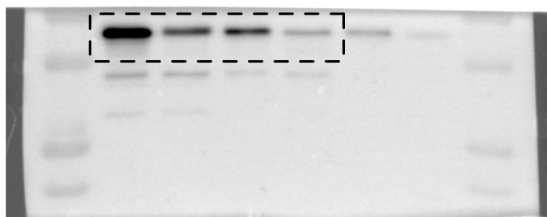

GAPDH

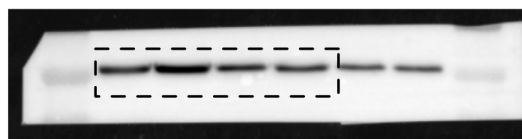

Blots for figure 5-figure supplement 4D

P-SMAD3

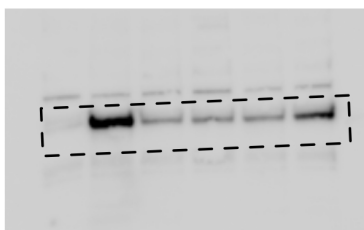

P-SMAD3

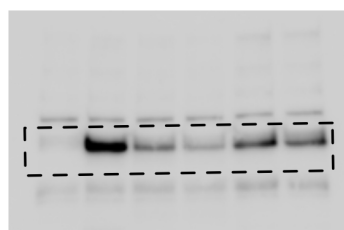

SMAD2/3

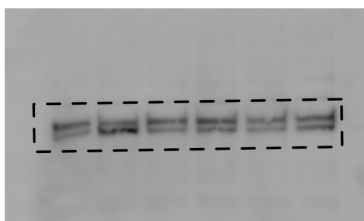

SMAD2/3

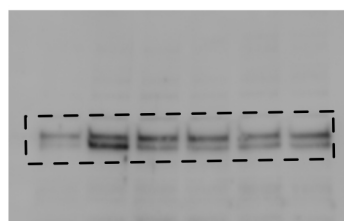

GAPDH

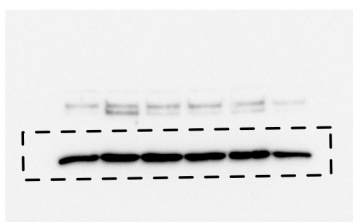

GAPDH

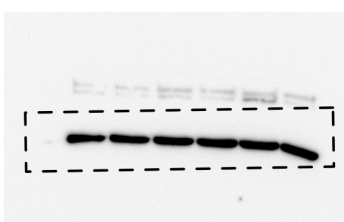

Blots for figure 5-figure supplement 5A

PRRX1

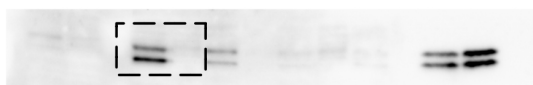

TUB

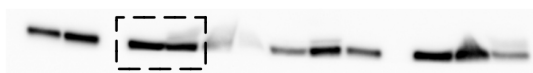

# Blots for Figure 5-figure supplement 5C

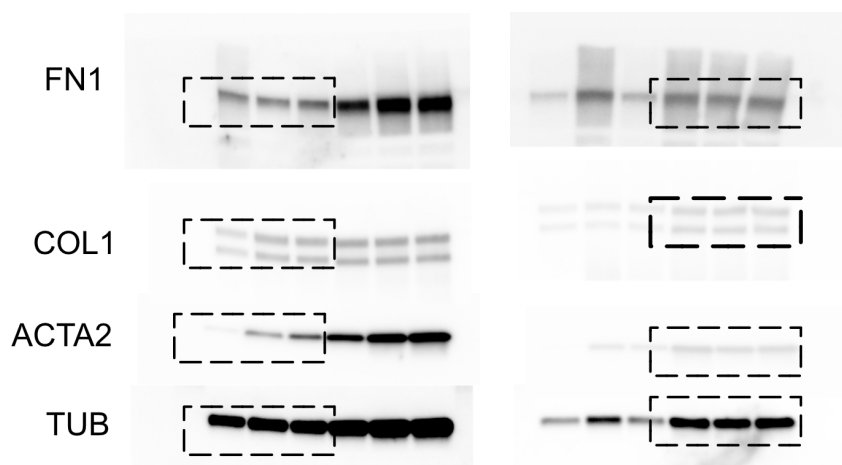

# Blots for Figure 6-figure supplement 1B

PRRX1 - upper panel

PRRX1 -lower panel

ACTB - upper panel

ACTB -lower panel

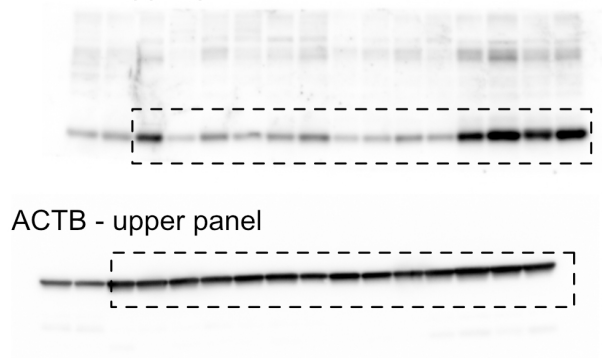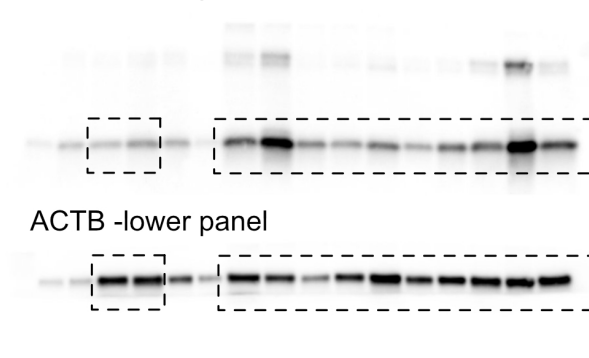

# Blots for Figure 6-figure supplement 2B

PRRX1

TUB

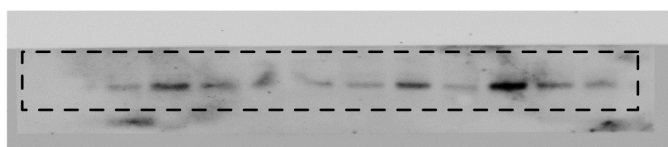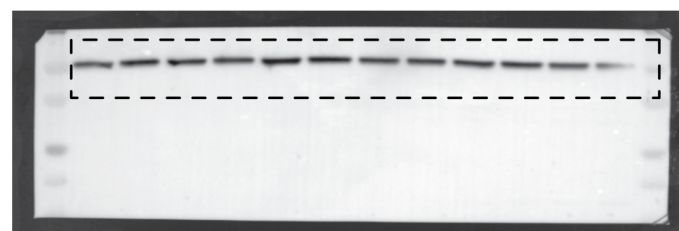

# Blots for Figure 6-figure supplement 2G

FN1

COL1

PRRX1

TUB

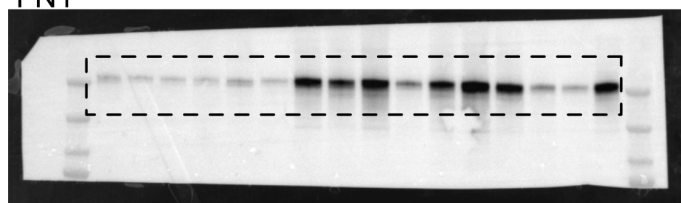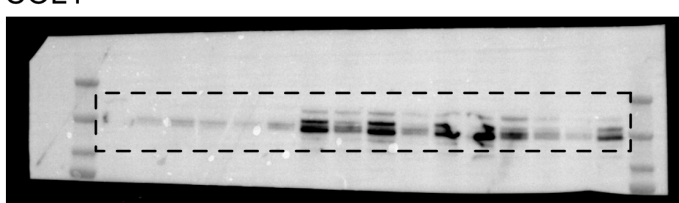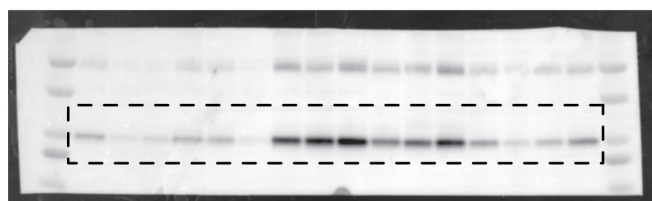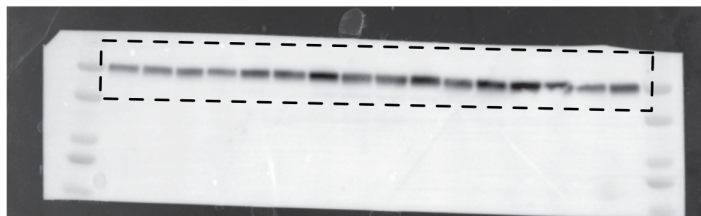

Blots for Figure 7-figure supplement 1F

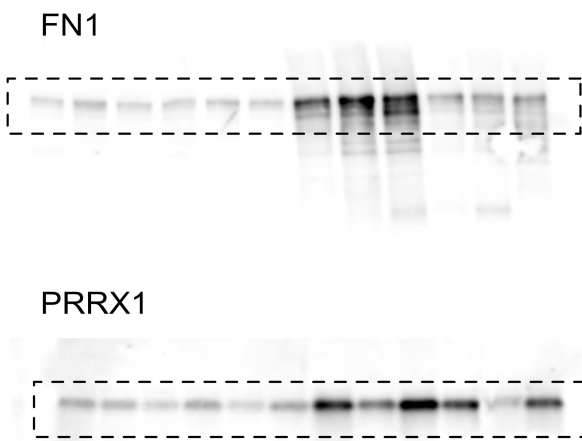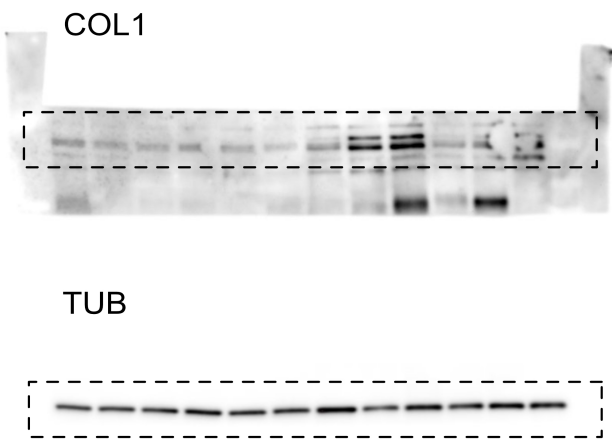

Blots for Figure 8-figure supplement 1B

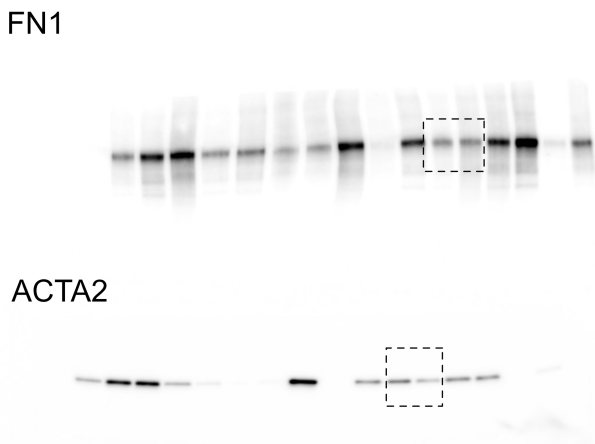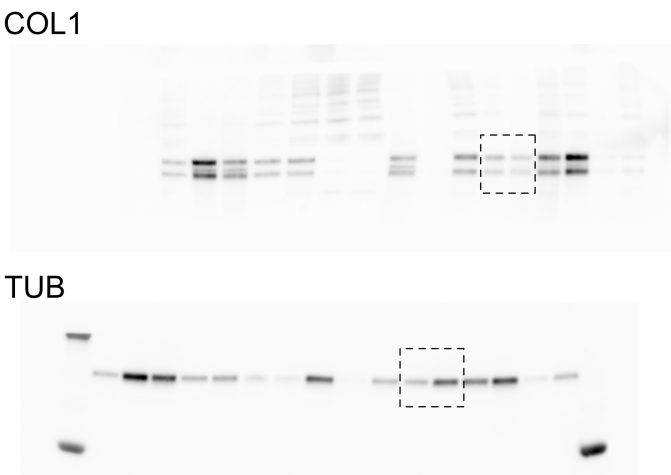

Supplement: fig3-figsupp1-data1 [file elife-79840-fig3-figsupp1-data1-v2.zip]
