# Supplementary material for: Identification of Paired-related Homeobox Protein 1 as a key mesenchymal transcription factor in pulmonary fibrosis
Source: eLife journal article supplement (doi:10.7554/elife.79840), 2023-06-01
Supplement: fig1-data1 [file Figure 1 - source data.xlsx]

## Sheet: Figure 1B
Figure 1B
PRRX1a mRNA		PRRX1b mRNA
Control	IPF	Control	IPF
0.0003	0.0003	0.0003	0.0003
0.0002	0.0004	0.0025	0.0004
0.0009	0.0034	0.0008	0.0006
0.002	0.0036	0.0016	0.0069
0.0019	0.0016	0.002	0.0028
0.0008	0.0003	0.0014	0.0024
0.0002	0.0006	0.0007	0.0004
0.0004	0.0021	0.0003	0.0005
0.0008	0.0024	0.0008	0.0015
0.0006	0.0055	0.0008	0.0014
0.0006	0.0006	0.0007	0.0049
0.0002	0.0005	0.0007	0.0005
0.0011	0.0004	0.0005	0.0013
0.0005	0.0013	0.0007	0.0008
0.0007	0.0003	0.0004	0.0022
0.0006	0.0003	0.0006	0.0005
0.0016	0.0015	0.0004	0.0005
0.0005	0.001	0.0016	0.0011
0.001	0.0018	0.0009	0.0008
0.0007	0.001	0.0008	0.0021
0.0017	0.003	0.0003	0.002
0.0005	0.0007	0.0009	0.0024
0.0011	0.0021	0.0005	0.0011
0.0017	0.0002	0.0014	0.0019
0.0015	0.0031	0.001	0.0003
0.0009	0.001	0.0007	0.0039
0.0004	0.0038	0.0003	0.0012
0.0018	0.0009	0.0014	0.0015
0.0005	0.0016	0.0004	0.0011
0.0002	0.0002	0.0003	0.001
0.0003	0.0047	0.0002	0.0005
0.0002	0.0056	0.0002	0.0053
	0.0033		0.0027
	0.0053		0.0048
	0.0004		0.0006
	0.0023		0.0011
	0.0012		0.0008

## Sheet: Figure 1C
Figure 1C
PRRX1 blot
Control	IPF
0.714154	1.30288
0.475803	1.21056
0.685001	0.914543
0.864659	0.936016
0.461018	1.12097
0.645154	0.929876
0.61919	3.59375
0.450701	3.09532
0.882502	2.86041
0.560642	3.31295
0.657572	3.26232
	0.494748
