# Supplementary material for: Identification of Paired-related Homeobox Protein 1 as a key mesenchymal transcription factor in pulmonary fibrosis
Source: eLife journal article supplement (doi:10.7554/elife.79840), 2023-06-01
Supplement: fig1-figsupp1-data1 [file Figure 1 - Supplement S1 - source data.xlsx]

## Sheet:  Figure1 - S1A
Figure 1-figure supplement 1A
PRRX1 IHC
Control	IPF
0.0689502	0.212514
0.0407205	0.145227
0.0442147	0.158232
0.0438213	0.103943
0.0375602	0.121511
	0.185302
