# Supplementary material for: Identification of Paired-related Homeobox Protein 1 as a key mesenchymal transcription factor in pulmonary fibrosis
Source: eLife journal article supplement (doi:10.7554/elife.79840), 2023-06-01
Supplement: fig2-data1 [file Figure 2 - source data.xlsx]

## Sheet: Figure 2C
Figure 2C
PRRX1a mRNA			PRRX1b mRNA
Fibro.	AECII	Macrophage	Fibro.	AECII	Macrophage
0.01162	0.0008973	1.3e-05	0.016473	0.0006862	0.000318
0.011411	8.3e-05	0.000414	0.015565	0.000923	0.000249
0.009857	0.000697	0.000165	0.021293	0.000683	0.0004013
0.01304	0.000384	1e-05	0.017993	0.000381	2e-05
0.013789			0.029238
0.02437			0.024621

## Sheet: Figure 2D
Figure 2D
PRRX1a mRNA		PRRX1b mRNA
Control	IPF	Control	IPF
0.027	0.0285	0.111991	0.168012
0.019	0.0462	0.0454153	0.198248
0.0192	0.0292	0.0741852	0.0859994
0.022	0.0176	0.0595601	0.0801786
0.0095	0.0319	0.0470453	0.204237
0.0237	0.0349	0.07636	0.185583
0.0226	0.0381	0.0763601	0.149068
0.0093		0.0303099
0.0322		0.178015
0.022		0.0880852
0.0225		0.10874

## Sheet: Figure 2E
Figure 2E
PRRX1 blot
Control	IPF
0.792449	0.740058
0.973593	0.542742
0.594414	1.37355
1.03793	0.543963
1.21888	0.783605
1.70781	0.745277
