# Supplementary material for: Identification of Paired-related Homeobox Protein 1 as a key mesenchymal transcription factor in pulmonary fibrosis
Source: eLife journal article supplement (doi:10.7554/elife.79840), 2023-06-01
Supplement: fig3-data1 [file Figure 3 - source data.xlsx]

## Sheet: Figure 3A
Figure 3A
+ TGF-b1 treatment					+ PGE2 treatment
PRRX1a mRNA		PRRX1b mRNA			PRRX1a mRNA		PRRX1b mRNA
Cont	IPF	Cont	IPF		Cont	IPF	Cont	IPF
0.277778	0.221053	0.170904	0.163266		1.69359	9.32286	1.20833	4.14334
0.24359	0.0779221	0.192059	0.085725		3.0101	2.2742	1.61935	1.44138
0.322917	0.123288	0.264796	0.178563		1.07394	23.3521	0.909755	17.3901
0.322727	0.130682	0.222315	0.217312		1.83634	1.01266	1.22262	0.816647
0.0909091	0.188088	0.266817	0.145687		3.5854	1.13691	3.66324	1.04294
0.505263	0.154728	0.13182	0.173902		1.65013	1.29526	1.07588	1.64621
0.472574	0.291339	0.442815	0.372053		6.89332		1.72811
0.411504		0.369385
0.124224		0.46697
0.272727		0.219217
0.431111		0.348789

## Sheet: Figure 3B
Figure 3B
PRRX1a mRNA							PRRX1b mRNA
basal		28 kPa		1.5 kPa			basal		28 kPa		1.5 kPa
Cont	IPF	Cont	IPF	Cont	IPF		Cont	IPF	Cont	IPF	Cont	IPF
0.02	0.06	0.03	0.12	0.022	0.09		0.023	0.06	0.041	0.109	0.031	0.076
0.008	0.072	0.045	0.141	0.015	0.081		0.011	0.054	0.052	0.122	0.021	0.081
0.011	0.032	0.056	0.181	0.008	0.041		0.015	0.034	0.062	0.175	0.019	0.051
0.018	0.081	0.078	0.231	0.024	0.097		0.027	0.056	0.081	0.204	0.031	0.089
0.017	0.041	0.023	0.099	0.02	0.042		0.019	0.041	0.041	0.153	0.032	0.038
0.009	0.023	0.078	0.142	0.012	0.045		0.018	0.031	0.056	0.071	0.032	0.056
0.005	0.038	0.095	0.175	0.042	0.071		0.007	0.023	0.031	0.0651	0.012	0.0402

## Sheet: Figure 3C
Figure 3C
+ NS398					+ Fasudil
PRRX1a mRNA		PRRX1b mRNA			PRRX1a mRNA		PRRX1b mRNA
Cont	IPF	Cont	IPF		Cont	IPF	Cont	IPF
0.165	0.245	0.299	0.481		2.08	2.49	1.11	1.48
0.619	0.389	0.6522	0.7653		2.31	2.34	2.34	2.31
0.317	0.029	0.2577	0.0571		2.45	3.21	0.83	3.66
0.066	0.356	0.5512	1.154		1.956	1.605	8.179	1.094
0.152	0.498	0.6813	0.6923		5.12	2.81	1.39	2.03

## Sheet: Figure 3D
Figure 3D
Elastic modulus (Pa)
Control ECM	IPF ECM
199.003	319.447
197.876	105.247
227.29	177.03

## Sheet: Figure 3E
Figure 3E
Fibroblast derived matrix (left panel)									Control Fibroblats on IPF Fibroblast derived matrix (right panel)
Control Fibroblasts				IPF Fibroblasts					PRRX1a mRNA				PRRX1b mRNA
PRRX1a mRNA		PRRX1b mRNA		PRRX1a mRNA		PRRX1b mRNA			Control	Imatinib	Nintedanib	PDGFR V inhib	Control	Imatinib	Nintedanib	PDGFR V inhib
Cont	IPF	Cont	IPF	Cont	IPF	Cont	IPF		5.12	0.12	0.62	0.68	4.33	0.44	0.78	0.87
3.4	10.79	2.01	7.06	1.053	1.089	0.928	0.901		8.03	0.55	3.7	1.13	5.15	2.19	3.61	1.63
0.86	6.97	1.34	5.69	1.338	1.139	1.13	0.836		1.81	1.56	0.51	1.48567	1.92	1.35	0.58	1.0568
0.77	3.23	1.39	1.54	1.095	1.68	1.028	1.041		2.23	1.03	0.89	2.12554	3.01	2.23	1.45	2.36541
0.6	3.48	0.86	2.85	2.82847	1.204	2.30286	0.957		3.12	0.96	0.84	0.46	2.98	1.35	1.09	0.491
1.46	2.93	1.23	1.73		1.51261		1.14616		2.74	0.85	1.42		2.09	1.56	1.32
1.5	1.98	1.8	3.77						3.14	1.15	1.41		2.6	1.09	1.01
1.63	2.14	1.66	2.73						2.456	1.85			3.024	2.2356
2.21	5.54	1.58	3.42						1.895	1.258			1.9854	1.5648
1.16	9.32	1.29	5.34						1.509	0.765			1.267	0.784
1.98	1.49	1.84	1.95
