# Supplementary material for: Identification of Paired-related Homeobox Protein 1 as a key mesenchymal transcription factor in pulmonary fibrosis
Source: eLife journal article supplement (doi:10.7554/elife.79840), 2023-06-01
Supplement: fig3-figsupp1-data1 [file Figure 3 - Supplement S1 - source data.xlsx]

## Sheet: Figure 3 - S1A
Figure 3 - Supplement 1A
PRRX1 blot (TGF-b1)
control	IPF
0.501114	0.473866
0.829602	0.295977
0.130125	1.90029
1.28083	0.460872
0.500216	0.255792
2.03578	0.155664
0.18065	1.81897
0.385139	0.26422
0.237673	2.09672
	0.186226
	0.526508

## Sheet: Figure 3 - S1B
Figure 3 - Supplement 1B
PRRX1 Immunofluorescence
control		IPF
basal	TGF-b1	basal	TGF-b1
0.209673	0.164185	0.324055	0.162158
0.229382	0.0838058	0.177925	0.141423
0.370982	0.255166	0.0755835	0.0382882
0.261354	0.250066	0.354387	0.215337
0.356615	0.176467	0.268487	0.198372
0.347858	0.185384	0.384395	0.156641
0.293933	0.184754	0.273034	0.0308799
0.372386	0.348913	0.518271	0.505876
		0.340383	0.160322

## Sheet: Figure 3 - S1C
Figure 3 - Supplement 1C
PRRX1 qPCR (TGF-b1)
4h				8h				16h				24h
PRRX1a mRNA		PRRX1b mRNA		PRRX1a mRNA		PRRX1b mRNA		PRRX1a mRNA		PRRX1b mRNA		PRRX1a mRNA		PRRX1b mRNA
control	IPF	control	IPF	control	IPF	control	IPF	control	IPF	control	IPF	control	IPF	control	IPF
1.1507	1.6015	0.7491	1.3123	1.6203	1.0603	1.6152	1.6985	1.2274	0.9373	1.1439	0.7858	0.6705	0.4423	0.3921	0.3329
1.6177	1.7855	0.5367	1.5569	4.137	1.6184	2.2389	1.9895	1.1678	1.2411	0.7534	1.6613	0.7535	1.1151	0.4057	1.3553
1.6019	0.6537	1.6472	0.7321	0.6716	0.5969	0.6801	0.7231	0.339	0.9754	0.3495	0.8575	0.6016	1.434	0.4175	1.1733
2.1674	0.94	2.296	1.149	0.9491	1.89	1.6779	1.2521	0.9566	0.5957	1.1446	0.4915	0.4574	1.6281	0.3387	1.1234
1.4068	1.1244	3.1962	0.9858	0.4337	1.0864	0.47	1.1371	0.524	0.6504	0.3422	0.4762	0.19	0.534	0.1777	0.4658

## Sheet: Figure 3 - S1D
Figure 3 - Supplement 1D
PRRX1 blot (TGF-b1)
4h		8h		16h		24h
control	IPF	control	IPF	control	IPF	control	IPF
1.49722	1.2572	3.40618	0.876065	0.799683	2.59841	2.75037	1.17331
1.51271	0.675384	4.99546	1.20148	0.707098	0.644059	0.846933	0.732863
1.46753	1.47857	3.1484	1.66987	0.928446	1.1212	0.747735	0.248938
2.86537	1.28018	1.42078	0.774161	1.27312	1.38678	1.05178	1.63911
1.12063	1.47733	0.358445	4.55194	1.42579	0.943743	0.742452	2.80217

## Sheet: Figure 3 - S1E
Figure 3 - Supplement 1E
PRRX1 blot (PGE2)
control	IPF
5.93529	4.36337
1.09706	4.9492
1.57453	4.37395
7.26294	5.07937
36.9729	4.60273
14.2445	3.16817
1.90203	1.85019
3.49384

## Sheet: Figure 3 - S1F
Figure 3 - Supplement 1F
PRRX1 Immunofluorescence
control		IPF
basal	PGE2	basal	PGE2
0.165241	0.22071	0.642527	0.501739
0.345653	0.571028	0.710411	0.788415
0.219336	0.280498	0.417033	0.736457
0.400744	0.778011	0.323964	0.498418
0.331582	0.324127	0.276609	0.34149
0.380267	0.67489	0.173422	0.370717
