# Supplementary material for: Identification of Paired-related Homeobox Protein 1 as a key mesenchymal transcription factor in pulmonary fibrosis
Source: eLife journal article supplement (doi:10.7554/elife.79840), 2023-06-01
Supplement: fig4-data1 [file Figure 4 - source data.xlsx]

## Sheet: Figure 4A
Figure 4A
PRRX1a mRNA					PRRX1b mRNA
Control		IPF			Control		IPF
PRRX1 siRNA#1	PRRX1 siRNA#2	PRRX1 siRNA#1	PRRX1 siRNA#2		PRRX1 siRNA#1	PRRX1 siRNA#2	PRRX1 siRNA#1	PRRX1 siRNA#2
0.0389287	0.0915209	0.379882	0.422882		0.0507681	0.0858065	0.307687	0.312329
0.0493096	0.118098	0.12172	0.179653		0.0472638	0.117705	0.121129	0.148618
0.277207	0.0894377	0.0557325	0.0783153		0.282583	0.108966	0.0612353	0.0893175
0.0619234	0.174321	0.572502	0.744446		0.0258983	0.0982751	0.593885	0.685064
0.0621847	0.0911311	0.0588173	0.0592001		0.110103	0.0979195	0.0529178	0.075895
0.0406591	0.0810684	0.156891	0.249594		0.0335904	0.0743497	0.283889	0.230634
0.224816	0.366081	0.229681	0.0621201		0.239349	0.345948	0.160416	0.19957
0.0614744	0.132979	0.0910805	0.275676		0.0575802	0.131155	0.0339339	0.0767469

## Sheet: Figure 4B
Figure 4B
PRRX1 blot
Control		IPF
PRRX1 siRNA#1	PRRX1 siRNA#2	PRRX1 siRNA#1	PRRX1 siRNA#2
0.0850868	0.227077	0.0870238	0.137882
0.0275032	0.0716709	0.161246	0.241036
0.101088	0.170008	0.180077	0.361773
0.0705347	0.116472	0.0482472	0.108052

## Sheet: Figure 4C
Figure 4C
Relative growth ratio
Control		IPF
PRRX1 siRNA#1	PRRX1 siRNA#2	PRRX1 siRNA#1	PRRX1 siRNA#2
0.695941	0.562871	0.933369	0.988773
0.873788	0.85254	0.591634	0.480611
0.582991	0.517892	0.644215	0.546115
0.430209	0.565572	0.314781	0.29025
0.911082	0.733465	0.918401	0.826811
1.5366	0.585832	0.65754	0.513539
		0.660518	0.566143
		0.573768	1.16436

## Sheet: Figure 4D
Figure 4D
% G1 Phase						% S Phase
Control		IPF				Control		IPF
PRRX1 siRNA#1	PRRX1 siRNA#2	PRRX1 siRNA#1	PRRX1 siRNA#2			PRRX1 siRNA#1	PRRX1 siRNA#2	PRRX1 siRNA#1	PRRX1 siRNA#2
1.31549	1.39771	1.08113	1.08278			0.521036	0.330097	0.742268	0.546392
1.17347	1.20578	1.125	1.17637			0.785	0.3925	0.621891	0.562189
1.12127	1.18657	1.07899	1.20063			0.767442	0.609302	0.686486	0.397297
1.06292	1.18708	1.0895	1.25129			0.819383	0.603524	0.807292	0.434896
1.03056	1.12903	1.13051	1.17627			0.955801	0.61326	0.731959	0.475773

## Sheet: Figure 4E
Figure 4E
CCNA2 mRNA					CCNE2 mRNA
Control		IPF			Control		IPF
PRRX1 siRNA#1	PRRX1 siRNA#2	PRRX1 siRNA#1	PRRX1 siRNA#2		PRRX1 siRNA#1	PRRX1 siRNA#2	PRRX1 siRNA#1	PRRX1 siRNA#2
0.59097	0.489192	0.725891	0.554392		0.841466	0.635447	0.697647	0.668831
0.779953	0.513538	0.447529	0.516659		0.749737	0.482015	0.353534	0.362906
0.633726	0.383782	0.284042	0.180438		0.942662	0.511401	0.710326	0.164508
0.860118	0.55522	1.02889	1.01907		1.0354	0.971784	1.02839	0.97335
1.09841	0.774455	1.12135	0.446103		0.891163	0.651562	0.777463	0.20987
0.678739	0.558631	0.746081	0.428354		0.687281	0.639426	1.09947	0.758544
0.624541	0.405194	1.24846	0.987142		0.519353	0.315818	0.794179	1.27922
0.521863	0.312786	0.728179	0.534393		0.652323	0.456057	0.672341	0.467227
0.904386	0.51009	0.780549	0.598715		0.538961	0.33789	0.452653	0.409716
0.627121	0.392915	0.588138	0.311021		0.398266	0.48929	0.588833	0.68766

## Sheet: Figure 4F
Figure 4F
% KI67 positive cells (FACS)
Control		IPF
siRNA#1	siRNA#2	siRNA#1	siRNA#2
0.569686	0.432056	0.561028	0.361884
0.655738	0.395082	0.640086	0.396552
0.707132	0.660091	0.637224	0.290221
0.681973	0.455782	0.70303	0.533333
0.609665	0.375465	0.476191	0.488536

## Sheet: Figure 4G
Figure 4G
	IgG ChIP					PRRX1 ChIP
GAPDH TSS	0.003	0.0024	0.0068	0.0019	0.0009	0.003	0.0085	0.01	0.00449	0.0009
CCNA2 prom.	0.0007	0.003	0.0002	0.00604415	0.0024025	0.0764	0.1544	0.0887	0.0648278	0.0236634
CCNE2 prom.	0.0089	0.0031	0.0139	0.00541582	0.0164571	0.0712	0.0941	0.2124	0.063198	0.286701
MKI67 prom.	0.0227	0.0183	0.0083	0.00878406	0.0105699	0.3163	0.0554	0.1557	0.0707722	0.211402
