# Supplementary material for: Identification of Paired-related Homeobox Protein 1 as a key mesenchymal transcription factor in pulmonary fibrosis
Source: eLife journal article supplement (doi:10.7554/elife.79840), 2023-06-01
Supplement: fig4-figsupp1-data1 [file Figure 4 - supplemental Figure 1 - source data.xlsx]

## Sheet: Figure 4 S1B
Supplemental Figure S4B
BrdU incorporation
Control		IPF
PRRX1 siRNA#1	PRRX1 siRNA#2	PRRX1 siRNA#1	PRRX1 siRNA#2
0.868604	0.800858	0.7455	0.3126
0.7806	0.5649	0.822407	0.853986
0.64268	0.587924	0.813327	0.893693
0.762956	0.755854	0.877214	0.918734
0.909526	0.842622	0.87995	0.855198

## Sheet: Figure 4 S1C
Supplemental Figure S4C
MKI67 mRNA					CDKN2A mRNA					CDKN1A mRNA					TP53 mRNA
Control		IPF			Control		IPF			Control		IPF			Control		IPF
PRRX1 siRNA#1	PRRX1 siRNA#2	PRRX1 siRNA#1	PRRX1 siRNA#2		PRRX1 siRNA#1	PRRX1 siRNA#2	PRRX1 siRNA#1	PRRX1 siRNA#2		PRRX1 siRNA#1	PRRX1 siRNA#2	PRRX1 siRNA#1	PRRX1 siRNA#2		PRRX1 siRNA#1	PRRX1 siRNA#2	PRRX1 siRNA#1	PRRX1 siRNA#2
0.25	0.26	0.6	0.61		1.05127	1.27791	1.01608	1.30569		1.48128	2.22401	1.86725	1.49718		0.826249	1.10885	1.15859	0.908127
0.41	0.15	1.17	0.67		1.22057	1.57271	1.5098	1.57349		1.1617	1.44414	2.56007	1.9259		1.00347	1.27115	1.60704	1.42572
1.03	0.7	0.75	0.63		1.49818	1.95736	1.54583	1.39556		1.58549	1.7122	1.58041	1.07695		1.14937	1.46154	1.21059	0.998991
0.95	0.09	0.56	0.5		1.24379	2.03326	1.15129	1.50304		1.38914	1.67006	1.12363	1.21225		0.978272	1.6739	1.0644	1.26814
0.31	0.31	0.6	0.39		1.90979	2.70919	0.963387	1.32565		1.51767	2.34815	1.00879	1.36137		1.29917	2.24143	0.749451	1.4115
0.71	0.5	0.37	0.43		1.71603	3.00231	1.34362	1.81482		0.794842	1.16389	1.63322	1.68716		1.55798	2.57153	1.23114	1.64676
0.52	0.54	0.25	0.26		1.40332	2.65742	2.33268	4.62702		1.82775	2.12083	3.40317	4.52889		1.31449	1.79778	2.4815	4.23456
0.73	0.54	0.65	0.26		2.18692	2.33783	1.52814	2.32852		2.14138	1.90521	1.56866	1.5418		1.46133	1.45488	1.07168	1.58983
					1.15424	3.22391	0.889335	1.24828		1.20384	2.71255	1.59474	1.87323		1.0851	2.87348	0.882668	1.14078
					1.30922	2.06348	1.42971	1.54981		1.57287	1.46011	2.27806	1.50768		1.13626	1.65177	1.1628	1.02788
