# Supplementary material for: Identification of Paired-related Homeobox Protein 1 as a key mesenchymal transcription factor in pulmonary fibrosis
Source: eLife journal article supplement (doi:10.7554/elife.79840), 2023-06-01
Supplement: fig5-data1 [file Figure 5 - source data.xlsx]

## Sheet: Figure 5A
Figure 5A
ACTA2 mRNA
Control		IPF
PRRX1 siRNA#1	PRRX1 siRNA#2	PRRX1 siRNA#1	PRRX1 siRNA#2
1.51162	0.276092	0.633674	0.193697
0.76423	0.607443	0.536044	0.589755
0.796453	0.872238	0.785225	1.35287
0.8741	0.72679	0.370823	0.318901
1.03884	0.866502	0.454526	1.23748
0.560612	0.198947	0.701343	0.597779
		0.527286	0.51941
		0.829615	0.93904
		0.868416	0.269525

## Sheet: Figure 5B
Figure 5B
ACTA2 blot
Control		IPF
PRRX1 siRNA#1	PRRX1 siRNA#2	PRRX1 siRNA#1	PRRX1 siRNA#2
0.811402	1.11632	0.345352	0.772702
0.715745	0.439571	0.111704	0.0449898
0.672061	0.779235	0.683223	0.556918
0.62646	0.144983	0.280217	0.250443
0.168864	0.0905457	0.497911	0.532056
0.433138	0.413921	0.714713	0.937128
		1.04855	0.583014

## Sheet: Figure 5D
Figure 5D
TGFBR2 mRNA
Control		IPF
PRRX1 siRNA#1	PRRX1 siRNA#2	PRRX1 siRNA#1	PRRX1 siRNA#2
0.1737	0.6596	0.3608	0.8441
0.7982	0.6078	0.1974	0.7
0.4838	0.3742	0.5456	1.241
0.2545	0.111	0.2939	0.4895
0.17	0.2894

## Sheet: Figure 5E
Figure 5E
P-SMAD3 blot
Control		IPF
PRRX1 siRNA#1	PRRX1 siRNA#2	PRRX1 siRNA#1	PRRX1 siRNA#2
0.0981105	0.0643072	0.312634	0.434839
0.0677165	0.0515883	0.602518	0.501923
0.134823	0.0824192	0.700393	0.270958
0.0930039	0.128251	0.742544	0.766694
0.045327	0.0272664	0.536864	0.628068
0.693683	0.422008	0.456042	0.650707

## Sheet: Figure 5F
Figure 5F
PPM1A mRNA
Control		IPF
PRRX1 siRNA#1	PRRX1 siRNA#2	PRRX1 siRNA#1	PRRX1 siRNA#2
1.68	1.42	1.23	1.67
1.17	1.51	4.04	3.45
1.99	1.76	1.39	1.36
2.02	2.49	1.34	1.6
1.65	1.02	1.06	1.21
1.22	1.32	1.27	2.79
1.26	1.25	2.44	2.91
		1.14	1.08
