# Supplementary material for: Identification of Paired-related Homeobox Protein 1 as a key mesenchymal transcription factor in pulmonary fibrosis
Source: eLife journal article supplement (doi:10.7554/elife.79840), 2023-06-01
Supplement: fig5-figsupp1-data1 [file Figure 5 - supplement Figure 1 - source data.xlsx]

## Sheet: Figure 5-S1A
Figure 5 Supplemental Figure 1A
ACTA2 mRNA					COL1A1 mRNA					FN1 mRNA
Control		IPF			Control		IPF			Control		IPF
PRRX1 siRNA#1	PRRX1 siRNA#2	PRRX1 siRNA#1	PRRX1 siRNA#2		PRRX1 siRNA#1	PRRX1 siRNA#2	PRRX1 siRNA#1	PRRX1 siRNA#2		PRRX1 siRNA#1	PRRX1 siRNA#2	PRRX1 siRNA#1	PRRX1 siRNA#2
0.453392	1.54757	0.263669	1.05929		0.972861	0.943757	0.714973	1.68963		0.6374	1.12456	0.459613	1.62784
1.43462	1.3262	0.960404	0.438733		1.36657	1.93608	0.81981	0.55441		1.33958	2.25453	1.01843	1.38824
1.15318	0.43809	0.416586	0.474377		1.35127	1.02249	0.734538	0.567502		2.17064	1.63889	0.679003	0.782106
0.731484	0.787042	0.587148	0.989963		0.778727	0.663026	0.873716	1.03527		0.572376	0.999957	0.71741	1.3978
0.763834	1.00131	0.730012	1.07943		1.75939	1.67848	2.23457	1.32512		0.895032	1.49601	1.09645	1.48915

## Sheet: Figure 5-S1B
Figure 5 Supplemental Figure 1B
ACTA2 blot					COL1A1 blot					FN1 blot
Control		IPF			Control		IPF			Control		IPF
PRRX1 siRNA#1	PRRX1 siRNA#2	PRRX1 siRNA#1	PRRX1 siRNA#2		PRRX1 siRNA#1	PRRX1 siRNA#2	PRRX1 siRNA#1	PRRX1 siRNA#2		PRRX1 siRNA#1	PRRX1 siRNA#2	PRRX1 siRNA#1	PRRX1 siRNA#2
0.814416	0.723828	0.90108	1.25822		1.09733	0.559266	1.61559	0.863869		0.863658	0.701672	1.0849	0.208598
1.09854	1.71164	1.14458	1.2885		2.12087	1.94177	0.768995	0.17754		1.58768	1.85883	1.37144	1.21274
0.184293	0.0933781	1.10179	1.2407		0.46989	0.102037	1.35784	2.35946		0.246362	0.295091	1.85864	4.188
1.22727	1.24595	0.910605	1.29421		3.69557	2.63075	1.30423	1.29287		1.26924	1.45109	0.947406	1.67434
0.800743	1.15074				0.904943	0.457005				1.31113	3.80098
0.9529	0.729365				0.882924	2.11908				1.38235	1.59334

## Sheet: Figure 5-S1C
Figure 5 Supplemental Figure 1C
TNC mRNA					TWIST1 mRNA
Control		IPF			Control		IPF
PRRX1 siRNA#1	PRRX1 siRNA#2	PRRX1 siRNA#1	PRRX1 siRNA#2		PRRX1 siRNA#1	PRRX1 siRNA#2	PRRX1 siRNA#1	PRRX1 siRNA#2
0.427671	1.88293	0.342212	0.76161		1.62	1.97	0.79	0.64
1.30734	0.268146	0.900831	1.08404		1.02	0.72	1.28	1.47
0.831292	0.841697	1.18241	1.63688		1.3	0.67	1.2	2.08
1.93933	1.70059	0.985496	1.43231		1.07	0.89	1.33	1.47
1.40232	1.40372	1.43939	1.80776		1.82	1.5	1.26	1.62
