# Supplementary material for: Identification of Paired-related Homeobox Protein 1 as a key mesenchymal transcription factor in pulmonary fibrosis
Source: eLife journal article supplement (doi:10.7554/elife.79840), 2023-06-01
Supplement: fig5-figsupp2-data1 [file Figure 5 - supplement Figure 2 - source data.xlsx]

## Sheet: Figure 5 - S2A
Figure 5 - Figure supplement 2A
ACTG2 mRNA					TAGNL mRNA
Control		IPF			Control		IPF
PRRX1 siRNA#1	PRRX1 siRNA#2	PRRX1 siRNA#1	PRRX1 siRNA#2		PRRX1 siRNA#1	PRRX1 siRNA#2	PRRX1 siRNA#1	PRRX1 siRNA#2
0.506153	0.847679	0.0821505	0.0838191		1.36861	0.485161	0.0765328	0.0385596
0.343331	0.492137	0.688592	0.137292		0.781331	0.373702	1.21125	0.0249923
0.312675	0.93323	0.425871	1.0852		0.531465	1.38724	0.710208	0.989291
0.566548	0.692079	0.41709	0.637734		0.633981	1.62715	0.706712	0.631135
0.572361	0.449318	0.459885	0.675237		0.925405	1.17919	0.999537	0.804206
		0.469115	0.616429		1.03996	0.636511	0.917609	0.970463
		0.381287	1.00243				1.153	1.471
		0.693601	0.411959				1.24406	0.560413

## Sheet: Figure 5 - S2B
Figure 5 - Figure supplement 2B
FN1 mRNA					COL1A1 mRNA
Control		IPF			Control		IPF
PRRX1 siRNA#1	PRRX1 siRNA#2	PRRX1 siRNA#1	PRRX1 siRNA#2		PRRX1 siRNA#1	PRRX1 siRNA#2	PRRX1 siRNA#1	PRRX1 siRNA#2
0.303905	0.228257	0.975984	0.243744		0.439883	0.385715	1.02968	0.231474
0.652961	0.728394	0.823152	0.0326168		0.851236	0.504764	0.911683	0.00709097
1.16024	0.907669	0.676028	1.24491		1.34303	1.44541	0.37711	0.676589
1.47938	1.18591	0.557769	0.677524		0.986024	0.703801	0.637668	0.768183
1.00933	1.00583	0.938584	1.42815		1.96727	1.13384	1.06548	2.25339
0.377785	0.239318	2.05429	1.774		1.22556	0.620633	2.41399	1.94319
		0.911708	0.87428				1.25196	0.841466
		0.849864	0.847378				1.58375	1.6422
		1.20923	0.394902				1.46376	0.534061

## Sheet: Figure 5 - S2C
Figure 5 - Figure supplement 2C
COL1A1 blot					FN1 blot
Control		IPF			Control		IPF
PRRX1 siRNA#1	PRRX1 siRNA#2	PRRX1 siRNA#1	PRRX1 siRNA#2		PRRX1 siRNA#1	PRRX1 siRNA#2	PRRX1 siRNA#1	PRRX1 siRNA#2
1.16604	0.95922	0.498201	0.60393		1.29906	0.449485	0.652867	0.208489
0.83808	2.54902	0.614486	1.10869		1.05007	1.09205	0.655433	0.272975
1.51136	0.899458	0.72982	0.98379		1.02058	1.29774	1.47386	2.1062
0.372261	0.525859	0.346776	1.21683		1.47656	1.02944
0.988068	0.726674	1.28924	0.619494		0.634942	0.478803
		1.3582	0.123824		1.69907	1.43125

## Sheet: Figure 5 - S2D
Figure 5 - Figure supplement 2D
TNC mRNA					ELN mRNA
Control		IPF			Control		IPF
PRRX1 siRNA#1	PRRX1 siRNA#2	PRRX1 siRNA#1	PRRX1 siRNA#2		PRRX1 siRNA#1	PRRX1 siRNA#2	PRRX1 siRNA#1	PRRX1 siRNA#2
1.27163	3.88599	2.09864	0.363479		0.229418	0.250818	0.423295	0.352666
0.945369	1.92943	1.13356	2.71235		0.307959	2.22705	0.292956	0.318062
1.8309	2.99261	0.994977	1.74572		0.306837	0.48525	0.178157	0.265224
2.8013	5.29144	1.08217	1.67541		1.32426	0.645557	0.626446	0.355358
2.42042	3.13369	4.36062	8.40493		1.09209	0.243309	0.844854	0.830985
1.65597	1.97534	1.8399	3.86662		0.632585	1.24613	1.01916	0.208122
		2.05682	5.14854
		2.67795	6.26736
