# Supplementary material for: Identification of Paired-related Homeobox Protein 1 as a key mesenchymal transcription factor in pulmonary fibrosis
Source: eLife journal article supplement (doi:10.7554/elife.79840), 2023-06-01
Supplement: fig5-figsupp3-data1 [file Figure 5 - supplement Figure 3 - source data.xlsx]

## Sheet: Figure 5 - S3A
Figure 5 - supplement Figure 3A
PRRX1 mRNA									TGFBR2 mRNA
siCont #1	PRRX1 siRNA#1	siCont #2	PRRX1 siRNA#2	siCont #1 +TGFb1	PRRX1 siRNA#1 + TGFb1	siCont #2 +TGFb1	PRRX1 siRNA#2 +TGFb1		siCont #1	PRRX1 siRNA#1	siCont #2	PRRX1 siRNA#2	siCont #1 +TGFb1	PRRX1 siRNA#1 + TGFb1	siCont #2 +TGFb1	PRRX1 siRNA#2 +TGFb1
9043	839	4289	316	10349	1151	4631	582		7674	2118	4925	2193	14245	7124	8853	7021
8619	1094	2642	332	11698	971	2932	384		10774	2491	4254	1716	18648	7712	8479	5024
