# Supplementary material for: Identification of Paired-related Homeobox Protein 1 as a key mesenchymal transcription factor in pulmonary fibrosis
Source: eLife journal article supplement (doi:10.7554/elife.79840), 2023-06-01
Supplement: fig5-figsupp4-data1 [file Figure 5 - supplement Figure 4 - source data.xlsx]

## Sheet: Figure 5 -S4A
Figure 5 - supplement Figure 4A
TGFBR2 blot
Control		IPF
PRRX1 siRNA#1	PRRX1 siRNA#2	PRRX1 siRNA#1	PRRX1 siRNA#2
0.0625206	0.180425	0.296373	0.612469
0.309391	0.47408	0.199052	0.251419
0.107302	0.786848	0.253865	0.594165
0.048186	0.298824	0.1247	0.70986
0.0589786	0.179565	0.211713	0.132049
		0.178514	0.530832
		0.0640877	0.109553
																								Figure 5 - supplement Figure 2A

## Sheet: Figure 5 -S4B
Figure 5 - supplement Figure 4B
PPM1A blot
Control		IPF
PRRX1 siRNA#1	PRRX1 siRNA#2	PRRX1 siRNA#1	PRRX1 siRNA#2
1.88834	1.92087	5.46382	5.16356
4.51486	1.7061	1.97615	1.64692
1.85024	1.73261	5.46382	1.53974
7.27741	1.46807	5.16356	1.73699
3.33479	3.77747	1.9169	4.17249

## Sheet: Figure 5 -S4C
Figure 5 - supplement Figure 4C
PPM1A blot
control	IPF
0.259716	0.252816
0.368282	0.270596
0.210871	0.184496

## Sheet: Figure 5 -S4D
Figure 5 - supplement Figure 4D
P-SMAD3 blot
Control		IPF
siPRRX1	siPRRX1 + siPPM1A	siPRRX1	siPRRX1 + siPPM1A
0.178847	0.378852	0.19308	0.726103
0.1831	0.336375	0.513528	0.648064
0.460538	0.544773	0.361209	0.529127

## Sheet: Figure 5 -S4E
Figure 5 - supplement Figure 4E
ChIP
IgG		PRRX1
GAPDH TSS	PPM1A prom.	GAPDH TSS	PPM1A prom.
0.003	0.0123	0.01	0.4486
0.0024	0.0183	0.00449	0.0583
0.0068	0.011	0.0009	0.1237
0.0019	0.0031	0.0085	0.1313
0.0009	0.0224	0.006455	0.1293
