# Supplementary material for: Identification of Paired-related Homeobox Protein 1 as a key mesenchymal transcription factor in pulmonary fibrosis
Source: eLife journal article supplement (doi:10.7554/elife.79840), 2023-06-01
Supplement: fig5-figsupp5-data1 [file Figure 5 - supplement Figure 5 - source data.xlsx]

## Sheet: Figure 5 - S5B
Figure 5 - Supplement Figure 5B
Acta2 mRNA					Col1a1 mRNA					Fn1 mRNA
+ TGFb1 1ng/ml		+ TGFb1 10ng/ml			+ TGFb1 1ng/ml		+ TGFb1 10ng/ml			+ TGFb1 1ng/ml		+ TGFb1 10ng/ml
WT	Prrx1 -/-	WT	Prrx1 -/-		WT	Prrx1 -/-	WT	Prrx1 -/-		WT	Prrx1 -/-	WT	Prrx1 -/-
7.1	0.903226	25.1	2.35484		11.8065	2.18182	8.3871	2.74545		27.8065	5.57143	19.6774	9.85714
3.05	1.99355	15.15	2.02581		7.67742	1.30864	7.16129	1.91358		16.5806	2.56522	14.7097	6.78261
3.28333	0.503226	5.23333	2.56774		7.16129	0.194175	8.90323	1.65049		16.2581	40.1379	21.1613	3.31034
3.92857	1.45161	11.8571	3.73548		20.7097	1.56716	8.19355	2.41791		57.2903	3.95455	40.1935	5.45455

## Sheet: Figure 5 - S5C
Figure 5 - Supplement Figure 5C
ACTA2 blot					COL1 blot					FN1 blot
+ TGFb1 1ng/ml		+ TGFb1 10ng/ml			+ TGFb1 1ng/ml		+ TGFb1 10ng/ml			+ TGFb1 1ng/ml		+ TGFb1 10ng/ml
WT	Prrx1 -/-	WT	Prrx1 -/-		WT	Prrx1 -/-	WT	Prrx1 -/-		WT	Prrx1 -/-	WT	Prrx1 -/-
17.4291	3.15318	16.4601	3.66741		2.621	0.897126	1.27696	0.980667		2.44305	1.15716	2.90685	2.07102
9.20856	3.78801	14.9687	1.70621		2.49236	0.435472	1.78668	0.545664		1.48578	1.12993	1.75428	3.00643
6.57269	1.70133	15.9802	1.96976		1.60209	1.23762	2.13419	1.09129		0.859029	1.63494	1.6198	1.64985
15.408	0.821309	20.8642	0.810089		1.26196	1.39012	1.81496	1.26776		4.54448	0.99679	1.99675	1.07847
7.63449	1.50216	24.2265	1.64015		1.75288	0.550176	1.66413	0.729927		1.27155	1.16484	1.19303	0.817236

## Sheet: Figure 5 - S5D
Figure 5 - Supplement Figure 5D
Lung spheroid - quantification (day 15)
Prrx1+/+ MEFs	Prrx1-/- MEFs
4.5	10
3.5	7.75
2.75	9.375
3.25	8
