# Supplementary material for: Identification of Paired-related Homeobox Protein 1 as a key mesenchymal transcription factor in pulmonary fibrosis
Source: eLife journal article supplement (doi:10.7554/elife.79840), 2023-06-01
Supplement: fig6-data1 [file Figure 6 - source data.xlsx]

## Sheet: Figure 6A
Figure 6A
Prrx1a mRNA				Prrx1b mRNA
PBS	Cont ASO	Prrx1 ASO		PBS	Cont ASO	Prrx1 ASO
0.120038	1.17702	0.262259		0.0346	0.228543	0.0749551
0.324512	0.814072	0.240848		0.072	1.90497	0.712174
0.308759	1.16922	0.692611		0.152	1.15794	0.0109237
0.166982	3.77122	0.0572323		0.128	2.67291	0.0710755
0.0553898	0.571834	0.165406		0.0152271	0.73429	0.496587
0.226553	2.58349	0.636421		0.155566	0.529536	0.38362
0.613751	1.13264	0.699433		0.163333	1.52271	0.0216051
0.482042	0.701008	0.428481		0.0960226	0.687221	0.0367145
	0.990863	0.217391			0.760179	0.0370464
	0.592313	0.456837			0.35845	0.0275412
	1.0712	0.068368			0.562387	0.0290443
	0.811279				0.814549
	1.20353				0.751495

## Sheet: Figure 6B
Figure 6B
PRRX1 blot
PBS	Cont ASO	Prrx1 ASO
0.742456	1.71155	0.969276
1.18289	2.80647	1.54347
1.07465	2.20489	1.77663
0.223224	3.19999	2.04106
0.833623	3.4993	2.07182
0.339787	3.52063	1.69988
0.243786	1.39702	1.76861
0.838857	2.78618	1.85464
1.47508	2.06409	1.90641
	4.48501	1.78381
	2.13543	1.30038
	2.48216	1.22055
	2.13033	1.60285
	1.39355	0.752789
	3.87491

## Sheet: Figure 6C
Figure 6C
	injury score
	Cont ASO	Prrx1 ASO
injury > 50%	12.1428	4.99999
25% < injury < 50%	43.5714	19.2857
injury < 25%	44.2857	75.7143

## Sheet: Figure 6F
Figure 6F
Hydroxyproline
Cont ASO	Prrx1 ASO
0.0154747	0.0221317
0.0204467	0.0213066
0.0219404	0.0167337
0.022986	0.0157083
0.0316464	0.0131905
0.0400857	0.0107135
0.0452185	0.00915361
