# Supplementary material for: Identification of Paired-related Homeobox Protein 1 as a key mesenchymal transcription factor in pulmonary fibrosis
Source: eLife journal article supplement (doi:10.7554/elife.79840), 2023-06-01
Supplement: fig6-figsupp1-data1 [file Figure 6 - supplement figure 1 - data source.xlsx]

## Sheet: Figure 6 - S1A
Figure 6 Supplement Figure 1A
PRRX1a mRNA											PRRX1b mRNA
PBS	Day 3	Day 7	Day 14	Day 21	Day 28						PBS	Day 3	Day 7	Day 14	Day 21	Day 28
0.556818	0.795907	3.02273	2.46591	5.56818	4.29545						0.564516	2.66667	1.75	2.48387	1.24194	5.08065
0.795455	0.838545	3.57955	2.54545	2.46591	0.954545						1.18548	1.46667	0.959677	11.1774	2.65323	1.52419
0.795455	1.47811	4.21591	2.54545	3.65909	4.05682						0.225806	1.86667	1.52419	17.7177	1.36129	7.73387
1.19318	1.27914	2.33798	2.70455	2.06818	11.0568						0.790323	2	4.66667	3.16129	1.24194	6.77419
1.19318	1.13701	7.12052	4.13636	1.75	2.54545						1.75	0.8	2.4	3.55645	1.52419	1.91935
1.19318	2.54545	2.32376	6.20455	2.70455	7.15909						0.959677	0.854839	9.2	2.76613	1.90323	9.82258
1.27273	3.02273	2.473	7.23864		4.21591						1.52419	1.75	16.6667	6.53333		7.05645
0.802302		1.52075	6.3104								0.493333		12.2667	13.3333
1.05244			3.69528								2.45333			7.2
0.891842			1.98977								0.826667			5.06667
1.22513			2.14611								0.24			5.06667
1.02828			3.44656								0.986667			7.46667
			1.15833											4.13333

## Sheet: Figure 6 - S1B
Figure 6 Supplement Figure 1B
PRRX1 blot
PBS	Day 3	Day 7	Day 14	Day 21	Day 28
1.16103	0.71685	0.454555	5.68983	2.19209	3.72036
0.690175	0.569673	0.384805	3.6861	2.40297	2.54506
0.900942	0.65179	0.642156	3.21065	2.47194	2.90779
1.24785	0.871456	0.60539	1.77378	1.98163	1.27253
0.830005			2.43973	1.09605	3.89677
1.22047			1.97742	1.20148	2.91623
1.28421			2.93675	1.23597	2.48632
0.465324
