# Supplementary material for: Identification of Paired-related Homeobox Protein 1 as a key mesenchymal transcription factor in pulmonary fibrosis
Source: eLife journal article supplement (doi:10.7554/elife.79840), 2023-06-01
Supplement: fig6-figsupp2-data1 [file Figure 6 - supplement figure 2 - data source.xlsx]

## Sheet: Figure 6 - S2A
Figure 6 - supplement figure 2A
Prrx1a mRNA			Prrx1b mRNA
WT	Prrx1 +/-		WT	Prrx1 +/-
2.3e-07	7.5e-07		4.4e-07	7.7e-07
8e-07	5.6e-07		5.9e-07	5e-07
3e-07	5.2e-07		2.5e-07	4.9e-07
2.2e-07	4.5e-07		3.7e-07	4.9e-07
3.9e-07	7.3e-07		6.1e-07	7.5e-07
1.18e-06	5.4e-07		2.3e-07	5.6e-07

## Sheet: Figure 6 - S2B
Figure 6 - supplement figure 2B
PRRX1 blot
WT	Prrx1 +/-
0.00082551	0.026961
0.0177946	0.076776
0.0880099	0.0180274
0.046519	0.144466
0.034455	0.0591079
0.018548	0.0866073

## Sheet: Figure 6 - S21E
Figure 6 - supplement figure 2E
	Injury score
	1			2			3
WT	0	0	0	0	50	100	100	50	0
Prrx1 +/-	0	33	0	50	50	0	50	17	0

## Sheet: Figure 6 - S2F
Figure 6 - supplement figure 2F
Hydroxyproline content
WT	Prrx1 +/-
117.321	36.935
93.566	211.957
54.829	81.417
63.155	183.31
84.768	37.596
72.49	75.94
102.13	166.009
96.215	88.779
	36.066
	79.996
	78.689
	96.766
	73.119
	84.497
	40.338
	89.826

## Sheet: Figure 6 - S2G
Figure 6 - supplement figure 2G
PRRX1 blot					COL1 blot					FN1 blot
WT	Prrx1 +/-	WT	Prrx1 +/-		WT	Prrx1 +/-	WT	Prrx1 +/-		WT	Prrx1 +/-	WT	Prrx1 +/-
0.214224	0.21002	0.668862	0.78779		0.205567	0.211899	0.914251	1.33665		0.0870633	0.117956	0.686683	0.478965
0.09	0.144203	1.01096	0.479223		0.19098	0.114349	0.577084	0.833672		0.08	0.099048	0.706655	1.23512
0.0774914	0.0423296	0.855279	0.269727		0.240385	0.261963	1.22825	0.518602		0.0832419	0.224907	0.850324	0.894218
		0.348024	0.502434				0.431851	0.3359				0.249024	0.322637
		0.770022	0.413076				0.955264	0.830091				0.795291	0.94562
