# Supplementary material for: Identification of Paired-related Homeobox Protein 1 as a key mesenchymal transcription factor in pulmonary fibrosis
Source: eLife journal article supplement (doi:10.7554/elife.79840), 2023-06-01
Supplement: fig6-figsupp3-data1 [file Figure 6 - supplement figure 3 - data source.xlsx]

## Sheet: Figure 6 - S3A
Figure 6 - supplement figure 3A
ACTA2 IHC
Cont ASO	Prrx1 ASO
6.52952	3.52417
11.8914	2.21651
13.0958	4.44775
8.89554	4.25928
6.55059	4.75245
7.22893	2.72306
	4.48478

## Sheet: Figure 6 - S3B
Figure 6 - supplement figure 3B
PDGFR IHC
Cont ASO	Prrx1 ASO
0.91	1.46
5.97	0.34
9.16	0.82
7.81	2.07
18.37	1.77
19.31	0.11
5.64	2.17

## Sheet: Figure 6 - S3C
Figure 6 - supplement figure 3C
KI67 PDGFR double IHC
Cont ASO	Prrx1 ASO
6.429	2.25
6.833	0.75
7	1.2
5.5	1.375
6.667	1.25
9.5	1.25

## Sheet: Figure 6 - S3D
Figure 6 - supplement figure 3D
Tgfb1 mRNA				Ctgf mRNA				Serpin1 mRNA				Tnf mRNA
PBS	Cont ASO	Prrx1 ASO		PBS	Cont ASO	Prrx1 ASO		PBS	Cont ASO	Prrx1 ASO		PBS	Cont ASO	Prrx1 ASO
0.0731219	0.138003	0.0136609		0.144703	0.410887	0.00659738		0.0286886	0.110889	0.00234597		0.0128663	0.169164	0.00194681
0.0762301	0.241993	0.0226703		0.25749	0.690889	0.00938723		0.0314509	0.220681	0.00598301		0.0176688	0.141931	0.00284531
0.108395	0.352789	0.0305444		0.309922	0.860182	0.171708		0.0532145	0.325723	0.00662274		0.0261293	0.259942	0.00407197
0.115789	0.761469	0.0314423		0.374601	2.03804	0.204942		0.0782101	0.423679	0.0227218		0.0301272	0.632493	0.0198979
0.196616	0.895122	0.0365622		0.519785	4.20756	0.410856		0.116197	0.552166	0.0568898		0.0794798	0.777788	0.0253597
0.307531	1.12565	0.126009		0.974559	7.99714	0.491645		0.130845	0.668828	0.0663013		0.0894288	0.819575	0.0510815
0.460756	1.12924	0.149271		2.87813	8.19357	0.677767		0.330734	0.811425	0.1418		0.143081	0.888959	0.0919517
0.519464	1.17104	0.322097		3.38174	10.2259	1.68489		0.353282	0.851395	0.153534		0.169364	1.09496	0.134068
	1.22646	0.421463			12.4785	5.81528			1.19931	0.205963			1.20213	0.316794
	1.27005	0.489007			13.0069	7.00742			1.2349	0.756268			1.39096	0.559066
	1.3732	1.01008			14.0434	12.7807			1.24543	1.07102			1.50046	1.06768
	1.63052				15.3257				2.44263				1.70834
	1.68445				22.9809				2.91295				2.4133

## Sheet: Figure 6 - S3E
Figure 6 - supplement figure 3E
Tnc mRNA				Eln mRNA				Col14a1 mRNA
PBS	Cont ASO	Prrx1 ASO		PBS	Cont ASO	Prrx1 ASO		PBS	Cont ASO	Prrx1 ASO
0.0407476	0.193768	0.004539		0.131777	1.09456	0.390311		0.0213526	0.235007	0.00335146
0.0254143	0.277946	0.00686724		0.0406054	1.48734	0.864357		0.0510711	0.359034	0.00379215
0.0236962	0.791949	0.0117369		0.0669398	0.92717	0.71116		0.0988177	0.732558	0.00815035
0.00999782	1.02603	0.0170795		0.0879653	0.615231	0.577858		0.0992522	0.762452	0.0101541
0.0179985	0.125942	0.0209573		0.0800282	1.0713	0.1876		0.118066	0.775598	0.0126505
0.200361	0.763016	0.081531		0.0980679	1.55044	0.214933		0.133148	0.795316	0.0559265
0.116601	0.860509	0.149769		0.184662	0.90399	0.359877		0.287234	0.926773	0.104508
0.157634	1.44946	0.249861		0.174054	0.393859	0.0484927		0.31484	1.07138	0.121598
	2.00597	0.267677			0.956106	0.088326			1.26856	0.173524
	1.24511	0.328441			0.767441	0.081615			1.30143	0.186669
	1.30575	0.947214			1.09801	0.135736			1.4526	0.31249
	1.69993				0.332954				1.61035
	1.25462				1.80159				1.70894
