# Supplementary material for: Identification of Paired-related Homeobox Protein 1 as a key mesenchymal transcription factor in pulmonary fibrosis
Source: eLife journal article supplement (doi:10.7554/elife.79840), 2023-06-01
Supplement: fig7-data1 [file Figure 7 -source data.xlsx]

## Sheet: Figure 7A
Figure 7A
Col1a1 mRNA				Fn1 mRNA				Acta2 mRNA
PBS	Cont ASO	Prrx1 ASO		PBS	Cont ASO	Prrx1 ASO		PBS	Cont ASO	Prrx1 ASO
0.0774597	0.384148	0.305473		0.0238	0.794478	0.0765041		0.151238	0.622245	0.619674
0.338917	0.646501	0.0110878		0.0743	0.686107	0.00612539		0.509073	0.777262	1.41674
0.448353	4.92628	0.0309867		0.126	0.505174	0.0258142		0.51794	2.16968	0.0260321
0.174748	0.712121	0.0303277		0.143	4.98534	2.39886		0.538993	3.38774	0.0599009
0.0134343	0.727273	0.00604608		0.0685773	0.73695	0.0847506		0.756302	0.355527	0.900668
0.164647	1.9899	1.7541		0.0037871	0.351416	0.045377		0.254256	1.47167	0.713208
0.124747	0.848485	0.0185939		0.0228591	1.34766	0.631184		0.25641	0.66365	0.469726
0.0732323	0.570707	0.0974747		0.0311498	0.443535	0.252132		0.249946	0.499892	0.0163111
	1.34343	1.19192			2.09144	0.211532			0.879121	0.0342599
	0.636364	0.656566			0.709655	0.019379			0.435251	0.0482655
	0.939394	0.372727			1.32719	0.0286933			1.54277	0.065656
	0.590909				0.542477				1.01487
	1.64141				1.89355				2.54256

## Sheet: Figure 7C
Figure 7C
COL1 blot				FN1 blot				ACTA2 blot
PBS	Cont ASO	Prrx1 ASO		PBS	Cont ASO	Prrx1 ASO		PBS	Cont ASO	Prrx1 ASO
0.98197	2.46491	3.16601		0.96114	2.34072	1.21215		0.701381	1.45418	0.78473
0.835304	7.44754	2.88572		0.677016	3.33107	0.796357		0.967581	1.05152	0.976483
1.18273	4.05615	2.70068		0.845661	3.98925	2.05567		1.33104	1.13187	0.978867
0.291372	3.63704	2.25811		1.47732	2.1291	1.04113		0.95698	1.33845	0.703124
0.74237	3.75395	1.29991		1.33617	1.94566	1.93971		0.959774	0.807718	1.00337
0.604869	6.01101	1.65918		0.795071	2.37998	2.53459		1.13866	0.774574	0.449383
0.738334	4.71629	2.82551		0.703435	6.2283	2.89492		0.973746	0.752161	0.539659
1.24045	1.55419	1.00175		0.985361	3.29175	2.61694		0.686073	1.48504	0.782214
1.02122	2.93313	0.830448		1.71835	3.38618	2.47971		1.34018	0.582149	0.452766
	1.52271	1.99595			3.34828	3.33149			1.26428	1.2044
	2.49128	0.861002			3.64075	2.00205			1.44088	1.05702
	3.78697	0.542712			2.36664	2.94225			1.56126	0.518852
	3.14828	1.89857			4.27911	2.86565			1.31064	0.501769
	2.81305	1.32663			4.92837	3.29088			1.03255	0.757155
	5.09149				2.40348				1.54186

## Sheet: Figure 7D
Figure 7D
Mki67 mRNA				KI67 positive cells (IHC)
PBS	Cont ASO	Prrx1 ASO		Cont ASO	Prrx1 ASO
0.106267	2.05957	0.181539		32	5.6
0.433108	1.33865	0.222756		18.2	16.8
0.27013	0.569628	0.866597		18.8	10.2
0.251868	2.9543	0.124752		10.4	3
0.161551	0.615219	0.264822		16.4	22.2
0.094015	0.638548	2.05438		16	12.4
0.203339	1.1687	0.763737		14.6	5.4
0.127101	0.693828	1.08778		19.6	14.8
	1.00393	0.215828		15.8	5.6
	1.05283	1.20667		28.2	2
	1.37065	0.120759		49.8	5.6
	0.827286			47.8	32.2
	1.61741			41.6	20.6
				46.6	2.6
					26.4
