# Supplementary material for: Identification of Paired-related Homeobox Protein 1 as a key mesenchymal transcription factor in pulmonary fibrosis
Source: eLife journal article supplement (doi:10.7554/elife.79840), 2023-06-01
Supplement: fig7-figsupp1-data1 [file Figure 7 - supplement figure 1 - data source.xlsx]

## Sheet: Figure 7 - S1C
Figure 7 - supplement figure 1C
	Injury score (%) - day 28
	1	2	3
Cont ASO	60	0	40
Prrx1 ASO	50	50	0

## Sheet: Figure 7 - S1D
Figure 7 - supplement figure 1D
Hydroxyproline content (μg/lobe)
Saline (day 0)		Bleomycin (day 0)
Saline	Cont ASO	Cont ASO	Prrx1 ASO
51.315	22.12	194.59	36.76
30.255	38.65	147.3	52.83
31.71	45.28	97	82.04
26.955	28.225	54.85	70.63
36.785	20.32	173.47
28.205	31.595

## Sheet: Figure 7 - S1E
Figure 7 - supplement figure 1E
PDGFR IHC
Cont ASO	Prrx1 ASO
21.185	5.29
15.2825	11.2475
21.2025	14.225
21.355	10.3325
16.25

## Sheet: Figure 7 - S1G
Figure 7 - supplement figure 1G
PRRX1 blot - day 28						COL1 blot - day 28						FN1 blot - day 28
Saline (day 0)		Bleomycin (day0)				Saline (day 0)		Bleomycin (day0)				Saline (day 0)		Bleomycin (day0)
Saline	Cont ASO	Cont ASO	Prrx1 ASO			Saline	Cont ASO	Cont ASO	Prrx1 ASO			Saline	Cont ASO	Cont ASO	Prrx1 ASO
1.11085	0.981529	3.93036	2.60825			1.38476	0.918997	2.67552	1.43254			0.731937	0.7628	4.60265	1.91347
1.08132	0.491823	5.08201	1.61445			0.845714	0.795615	5.65382	1.27858			1.46984	1.0655	8.76165	2.58678
0.807832	0.838735	4.82726	2.25718			0.769523	1.1905	6.33557	2.35383			0.798224	0.561531	12.3473	3.61197
0.775581	0.488368	3.28401	2.30718			1.44499	0.874444	3.43496	2.36276			0.687367	0.251355	6.15517	1.3629
0.852435	0.707646	4.49553				0.539546	1.42182	6.52252				0.438005	0.27797	8.32639
0.972914	0.348027					0.535622	1.21094					0.316843	0.281956
