# Supplementary material for: Identification of Paired-related Homeobox Protein 1 as a key mesenchymal transcription factor in pulmonary fibrosis
Source: eLife journal article supplement (doi:10.7554/elife.79840), 2023-06-01
Supplement: fig8-data1 [file Figure 8 -source data.xlsx]

## Sheet: Figure 8A
Figure 8A
Prrx1a mRNA			Prrx1b mRNA			Acta2 mRNA			Col1a1 mRNA			Fn1 mRNA
Cont ASO	Prrx1 ASO		Cont ASO	Prrx1 ASO		Cont ASO	Prrx1 ASO		Cont ASO	Prrx1 ASO		Cont ASO	Prrx1 ASO
3.8045	2.0278		3.8795	1.2399		2.3702	0.9803		21.0775	14.0106		1.4006	0.9716
3.571	0.6505		1.4601	0.5132		1.2735	0.4053		11.011	4.4101		6.0852	1.7474
1.65	0.6584		1.3678	0.3206		1.8	1.3674		3.0377	0.607		2.4412	0.1318
2.4078	0.2408		1.8053	0.2519		1.2794	0.8244		2.0243	0.4245		1.9049	0.4181
1.5022	0.0585		2.2787	0.9139		2.2451	0.1135		6.9418	3.3923		3.0472	1.7441
2.3082	1.0046		10.668	1.4872		2.3681	1.1075		2.1737	1.9585		1.4644	0.7602

## Sheet: Figure 8B
Figure 8A
PRRX1 blot			COL1 blot			FN1 blot
Cont ASO	Prrx1 ASO		Cont ASO	Prrx1 ASO		Cont ASO	Prrx1 ASO
2.63064	1.63608		8.62593	4.2616		12.2571	11.5372
1.91056	0.735609		7.98269	5.87889		3.87523	3.95582
5.00695	0.704999		2.96759	1.40246		7.35872	7.86866
3.21312	1.04093		5.54238	1.95621		2.82609	0.832231
3.91791	0.889786		2.4759	2.95875		2.08898	1.51112

## Sheet: Figure 8C
Figure 8A
PRRX1a mRNA			PRRX1b mRNA			ACTA2 mRNA			COL1A1 mRNA			FN1 mRNA
Cont ASO	Prrx1 ASO		Cont ASO	Prrx1 ASO		Cont ASO	Prrx1 ASO		Cont ASO	Prrx1 ASO		Cont ASO	Prrx1 ASO
1.6477	0.0713		1.5119	0.6848		2.8563	1.5372		1.8643	2.1072		6.7893	3.9457
1.7029	0.3594		1.2161	0.7863		1.3603	0.3964		2.4197	1.2474		2.9018	2.0917
1.7946	1.0534		2.9618	0.9919		1.2653	1.1067		1.3364	0.8675		5.3938	4.6686

## Sheet: Figure 8D
Figure 8A
Picrosirius
Cont ASO	Prrx1 ASO
1.85392	1.18497
1.7241	1.2396
1.69537	1.15512
