# Supplementary material for: Identification of Paired-related Homeobox Protein 1 as a key mesenchymal transcription factor in pulmonary fibrosis
Source: eLife journal article supplement (doi:10.7554/elife.79840), 2023-06-01
Supplement: fig8-figsupp1-data1 [file Figure 8 - supplement figure 1 - source data.xlsx]

## Sheet: Figure 8 - S1A
Figure 8 - supplement figure 1A
mouse PCLS (basal) - mRNA
Col1a1	Fn1	Acta2	Prrx1a	Prrx1b
0.4075	0.8874	0.7465	0.2545	0.2177
0.3031	0.3557	0.7058	0.2976	0.1752
0.5226	0.5071	0.6298	0.2261	0.1594
1.4678	1.043	1.9968	0.8252	0.3824
2.6553	3.7801	0.7187	0.7597	0.2019
0.8751	1.0411	3.0309	0.5494	0.4939
1.0306	0.9412	0.8175	0.2756	0.2182
1.9812	0.7238	0.6883	0.6348	0.9747

## Sheet: Figure 8 - S1B
Figure 8 - supplement figure 1B
mouse PCLS (basal) - blot
ACTA2	COL1	FN1
0.855481	1.32248	1.50721
0.253504	0.3574	0.344037
0.248491	0.557968	0.952834
0.664142	1.88048	1.88594
0.643211	0.266443	2.02541
0.17586	0.315569	0.488454

## Sheet: Figure 8 - S1C
Figure 8 - supplement figure 1C
Human control PCLS (basal) - mRNA
PRRX1a	PRRX1b	FN1	A1COL1	ACTA2
0.3309	0.3812	1.7103	0.6803	1.8972
0.3626	0.3624	1.1052	0.402	1.2806
0.4531	0.545	0.956154	1.2688	1.3165
0.5065	0.701	1.4099	0.9807	0.9427
0.2898	0.2987	0.6576	0.5332	0.4375

## Sheet: Figure 8 - S1D
Figure 8 - supplement figure 1D
Human IPF PCLS (basal) - mRNA
PRRX1a	PRRX1b	ACTA2	COL1A1	FN1
0.0615	0.1179	0.0583949	0.00054359	0.00161719
0.136378	0.341328	0.5148	0.321545	0.266622
0.5247	0.6635	0.5148	0.8332	0.7375
